# Supplementary material for: RstA Is a Major Regulator of Clostridioides difficile Toxin Production and Motility
Source: mBio. 2019 Mar 12;10(2):e01991-18. doi: 10.1128/mBio.01991-18 (PMC6414698; doi:10.1128/mBio.01991-18)
Supplement: FIG S9 [file mBio.01991-18-sf009.pdf]

## Figure S9.

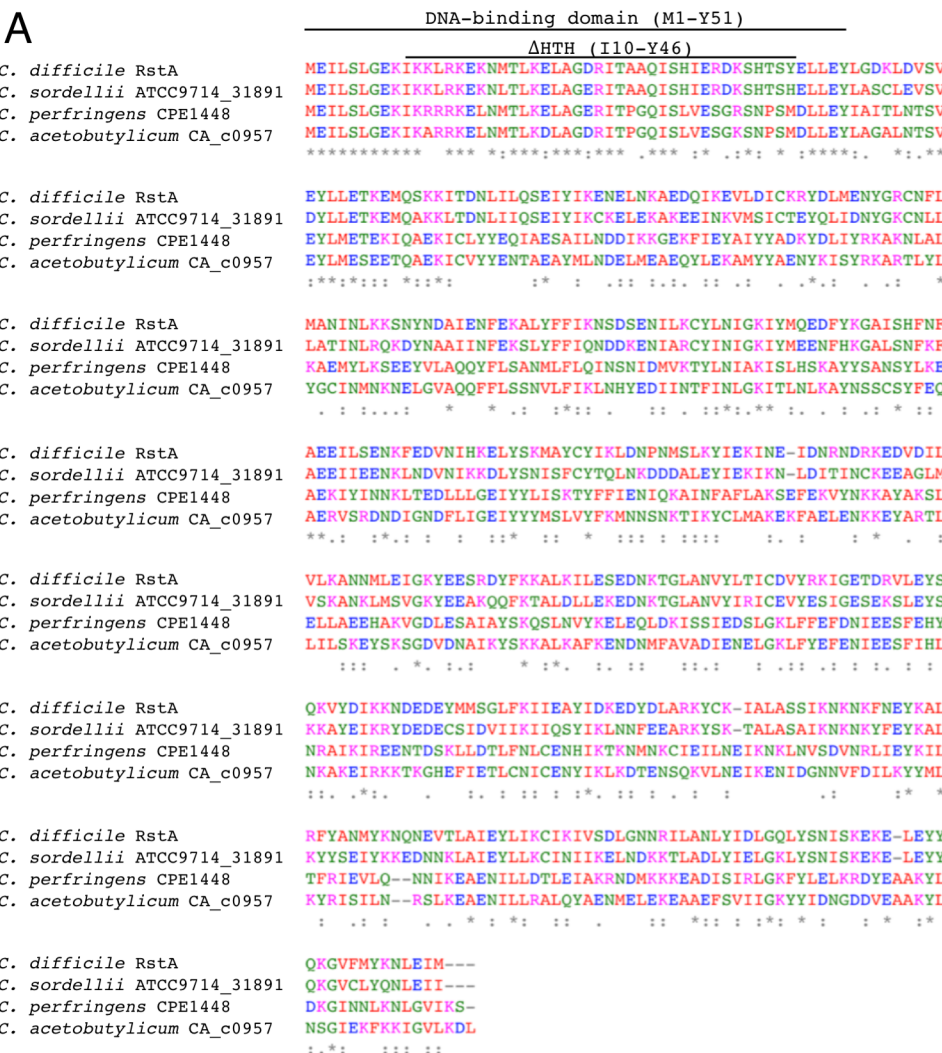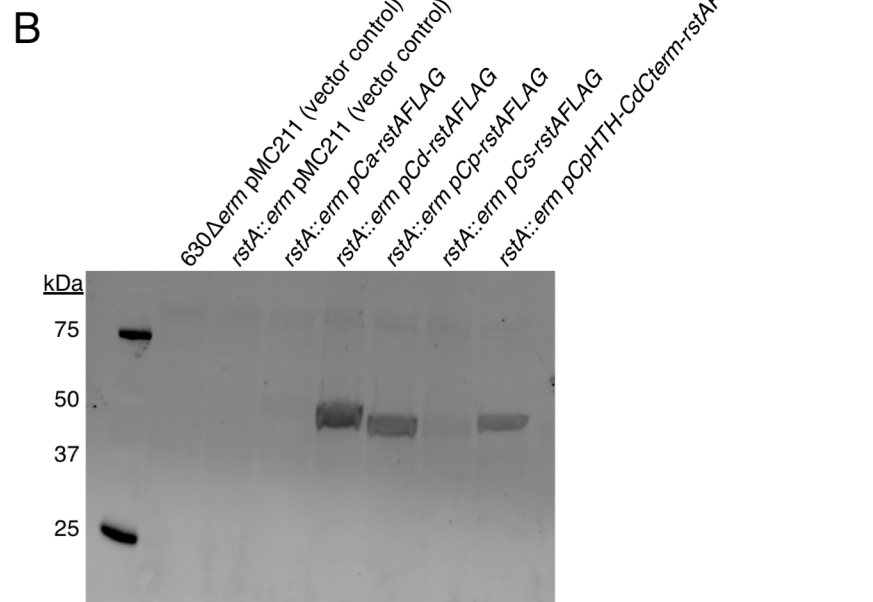

**Figure S9. Alignment and stability of RstA orthologs encoded in *C. difficile* 630, *C. sordellii* ATCC 9714, *C. perfringens* S13, *C. acetobutylicum* ATCC 824. (A)** Multiple sequence alignment performed by EMBL-EBI Clustal Omega tool. The regions denoting the DNA-binding domain (from M1 to Y51), which were used in the RstA *C. perfringens* DNA-binding domain-*C. difficile* C-terminal domains hybrid construct, and the residues deleted in conserved helix-turn-helix motif for the *rstA*ΔH<sub>TH</sub>-3XFLAG construct are marked. The key is as follows: (\*) identical; (:) strongly conserved; and (.) weakly conserved residues. The colors group the amino acid residues based on their physiochemical properties: (red) small, hydrophobic residues; (blue) acidic residues; (magenta) basic residues; and (green) hydroxyl-FLAG M2 antibody to detect recombinant RstA-3XFLAG proteins (~51 *erm* pMC211 (MC505; vector control), *rstA::erm* pMC828 (MC1323; 04; *Clostridium difficile* *rstA*), *rstA::erm* pMC829 (MC1324; *Clostridium* *n sordellii* *rstA* [ATCC9714\_3891]) and *rstA::erm* pMC798 (MC1257; entered with 2 μg/ml thiamphenicol and 1 μg/ml nisin at H<sub>24</sub>.

Sievers F, Wilm A, Dineen D, Gibson TJ, Karplus K, Li W, Lopez R, McWilliam H, Remmert M, Soding J, Thompson JD, Higgins DG. 2011. Fast, scalable generation of high-quality protein multiple sequence alignments using Clustal Omega. *Mol Syst Biol* 7:539.
