# Supplementary material for: RstA Is a Major Regulator of Clostridioides difficile Toxin Production and Motility
Source: PubMed Central journal article supplement (PMC6414698; doi:10.1128/mbio.01991-18), 2019-03-12
Supplement: mBio.01991-18-sf002.pdf [file mBio.01991-18-sf002.pdf]

Figure S2.

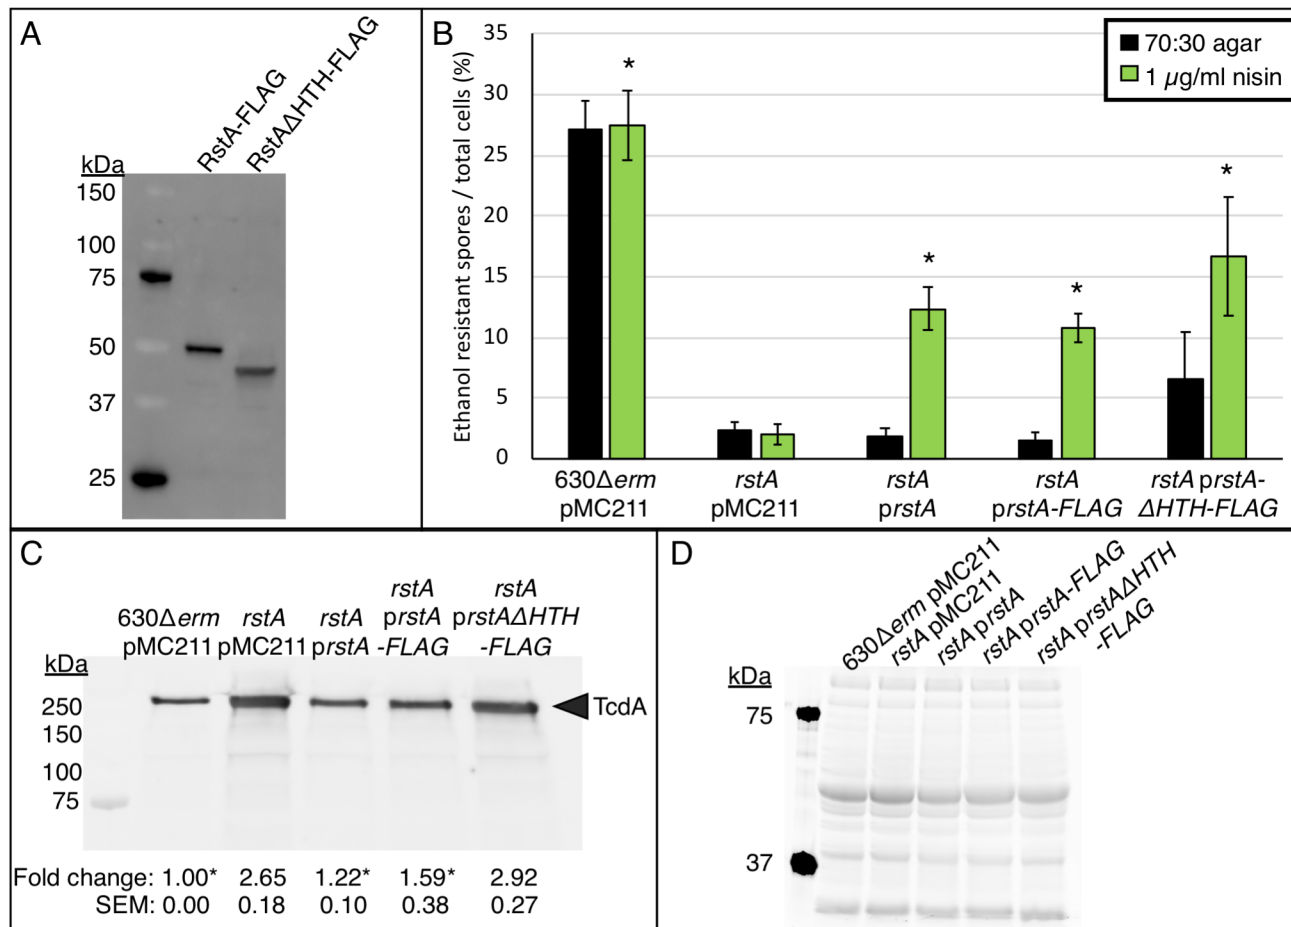

**Figure S2. The conserved helix-turn-helix (HTH) DNA-binding domain of RstA is not necessary for positively controlling sporulation but is required for the regulation of toxin production and *PrstA* expression.** (A) Western blot analysis using FLAG M2 antibody in *rstA* p*PcprA*-*rstA*-3XFLAG (MC1004) and *rstA* p*PcprA*-*rstA* $\Delta$ HTH-3XFLAG (MC1028) grown in TY medium, pH 7.4, at log phase ( $OD_{600} = 0.5$ ). (B) Ethanol resistant spore formation of 630 $\Delta$ erm pMC211 (MC282; vector control), *rstA*::erm pMC211 (MC505; vector control), *rstA*::erm p*PcprA*-*rstA* (MC480), *rstA*::erm p*PcprA*-*rstA*-3XFLAG (MC1004) and *rstA*::erm p*PcprA*-*rstA* $\Delta$ HTH-3XFLAG (MC1028) grown on 70:30 sporulation agar supplemented with 2  $\mu$ g/ml thiamphenicol in the absence or presence of 1  $\mu$ g/ml nisin. Sporulation frequency is calculated as the number of ethanol-resistant spores divided by the total number of cells enumerated at  $H_{24}$ . The limit of detection for ethanol resistant spores is 20 CFU/ml. Western blot analysis of TcdA (C) and corresponding Stain-free image of total protein (D) in 630 $\Delta$ erm pMC211 (MC282; vector control), *rstA*::erm pMC211 (MC505; vector control), *rstA*::erm p*PcprA*-*rstA* (MC480), *rstA*::erm p*PcprA*-*rstA*-3XFLAG (MC1004) and *rstA*::erm p*PcprA*-*rstA* $\Delta$ HTH-3XFLAG (MC1028) grown in TY medium, pH 7.4, at 24 h. The means and standard error of the means of at least three independent biological replicates are shown; asterisks represent  $P \leq 0.05$  by one-way ANOVA followed by Dunnett's multiple comparison's test compared to the *rstA*::erm pMC211 strain (MC505).
