# Supplementary material for: RstA Is a Major Regulator of Clostridioides difficile Toxin Production and Motility
Source: PubMed Central journal article supplement (PMC6414698; doi:10.1128/mbio.01991-18), 2019-03-12
Supplement: mBio.01991-18-sf003.pdf [file mBio.01991-18-sf003.pdf]

Figure S3.

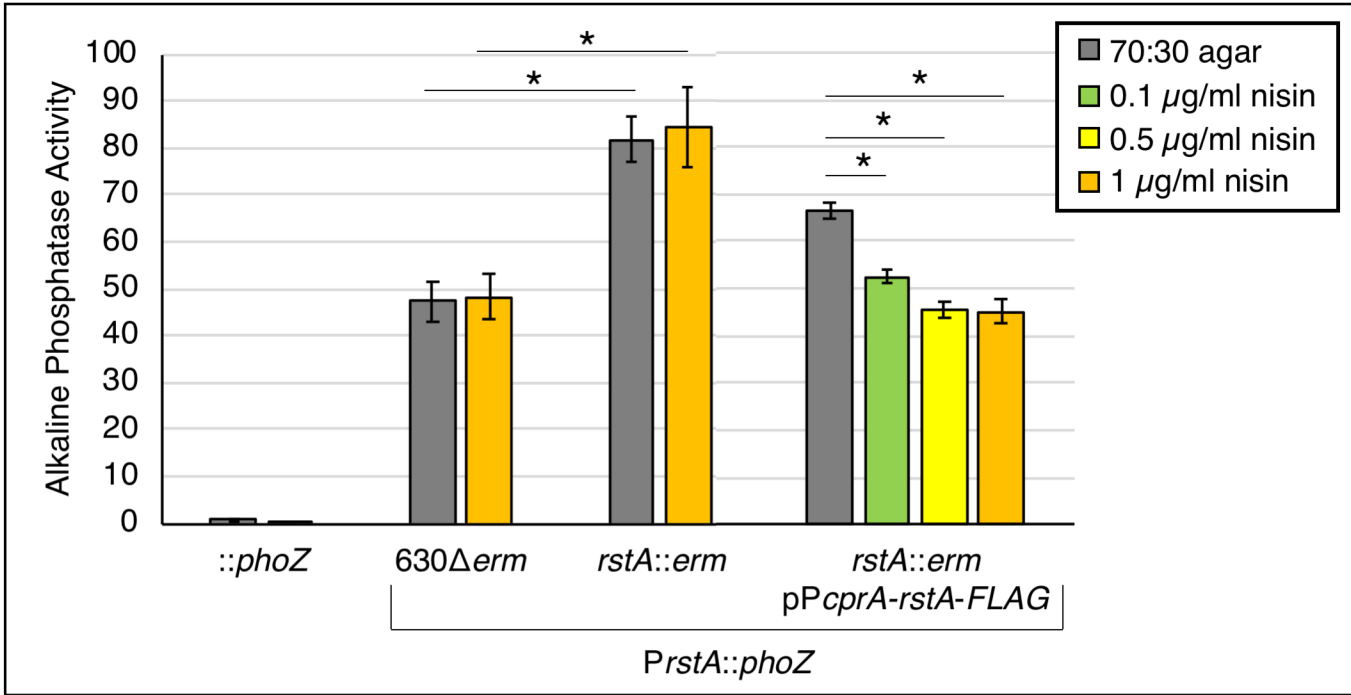

**Figure S3. Overexpression of RstA represses *PrstA::phoZ* alkaline phosphatase activity in a dose-dependent manner.** Alkaline phosphatase (AP) activity of a promoterless *::phoZ* construct in the *630Δerm* background (MC448), the *PrstA::phoZ* construct expressed in *630Δerm* (MC773) and the *rstA::erm* mutant (MC774), and the *PrstA::phoZ* construct divergently expressed from the nisin-inducible *PcprA-rstA-3XFLAG* construct in the *rstA::erm* mutant (MC1435) grown on 70:30 agar supplemented with the indicated concentration of nisin at H<sub>8</sub>. The means and standard error of the means of three biological replicates are shown. \*, *P* < 0.05 by one-way ANOVA followed by Tukey's multiple comparison's test between the comparisons indicated in the figure.
