# Supplementary material for: RstA Is a Major Regulator of Clostridioides difficile Toxin Production and Motility
Source: PubMed Central journal article supplement (PMC6414698; doi:10.1128/mbio.01991-18), 2019-03-12
Supplement: mBio.01991-18-sf004.pdf [file mBio.01991-18-sf004.pdf]

# Figure S4.

```

630      -----TGCTTTTAATGAAATTATTGT-AAAAGACAAATTTAGAATAAATTTATTTTATA -176
R20291   GATATATTGTACAAATAAAATTGAAATATATGGAAGAATATAGAATAAAGATGAGATTTG -169
          * *   ***   *****   * *   **   ***   *****   *   * *

630      TTGTAAATTTTTGTAAATTTTAAATATATATGTACATCATATAAAATTAATGTTATAAAAT -116
R20291   TCTAATATTTTTATAAAATTA AAAATATTTTCAAAGAG--TTTATTATAAAATTGTAGACT -111
          *   *   *****   *****   ***** *   * *   * **   *****   *   * *

630      ATAAATATATTAAAAATATTATAAAATTTAATATTAGAAATTA AATTA AAAAATT---AC -59
R20291   ATA-----GTGTTTATAATCTTTGTAATTATTGGTAACTAAATTTAAAAAATAAAAT -59
          ***                               *** **   * *   ***** * **   *****   ***** *   *

630      ATAAAAAATACTTAAAAAATATTTAAAAAATTTGTTATTTATTGTATACTTAAGTT +1
R20291   ATTTAATTATACACAAAAAAGATATTTAAAAAATTTGTTATTTATTGTATACTTAAGTT
          **   **   *   *****   *****   *****   *****   *****   *****

```

**Figure S4. Sequence alignment of the *flgB* promoters from *C. difficile* 630 and R20291 (229 bp total).** The *PflgB* sequence is identical between 630 and its derivative 630 $\Delta$ *erm*. The asterisks below the sequence indicate identical nucleotides. The -35 and -10 consensus sequence of the  $\sigma^A$ -dependent promoter are marked, which are identical between both the 630 and the R20291 strains (Soutourina, *et al.* 2013).

Soutourina OA, Monot M, Boudry P, Saujet L, Pichon C, Sismeiro O, Semenova E, Severinov K, Le Bouguenec C, Coppee JY, Dupuy B, Martin-Verstraete I. 2013. Genome-wide identification of regulatory RNAs in the human pathogen *Clostridium difficile*. *PLoS Genet* 9:e1003493.
