# Supplementary material for: RstA Is a Major Regulator of Clostridioides difficile Toxin Production and Motility
Source: PubMed Central journal article supplement (PMC6414698; doi:10.1128/mbio.01991-18), 2019-03-12
Supplement: mBio.01991-18-sf006.pdf [file mBio.01991-18-sf006.pdf]

Figure S6.

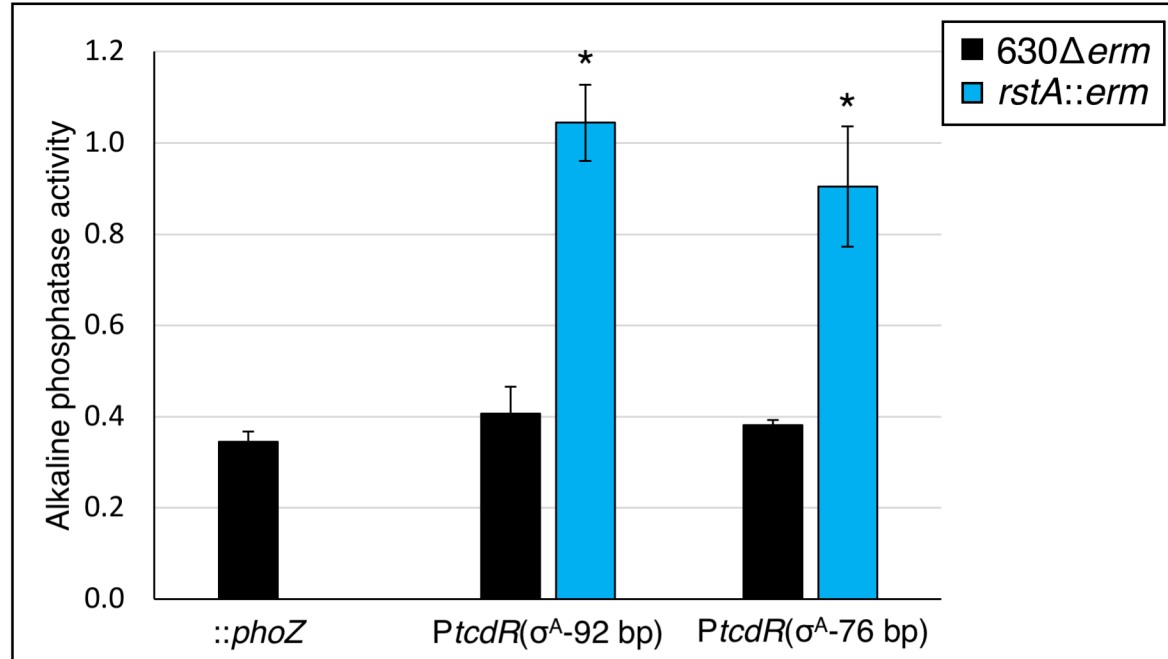

**Figure S6. RstA-mediated repression of two *PtcdR*  $\sigma^A$ -dependent promoter fragments of different lengths is similar.** Alkaline phosphatase (AP) activity of a promoterless *::phoZ* construct in the 630Δ*erm* background (MC448) and a longer 92 bp  $\sigma^A$ -dependent *PtcdR::phoZ* reporter fusion in 630Δ*erm* (MC1143) and the *rstA::erm* mutant (MC1144) grown in TY medium, pH 7.4 at H<sub>24</sub>. The means and standard error of the means of four biological replicates are shown. \*,  $P < 0.05$ , using Student's *t*-test compared to the activity observed in the 630Δ*erm* parent strain for each promoter construct. The measured AP activity and calculated fold change between the *rstA* background versus the parent is the same as the 76 bp promoter region (Fig. 2B; no statistically significant difference between the 92 bp and 76 bp reporters).
