# Supplementary material for: RstA Is a Major Regulator of Clostridioides difficile Toxin Production and Motility
Source: PubMed Central journal article supplement (PMC6414698; doi:10.1128/mbio.01991-18), 2019-03-12
Supplement: mBio.01991-18-sf007.pdf [file mBio.01991-18-sf007.pdf]

Figure S7.

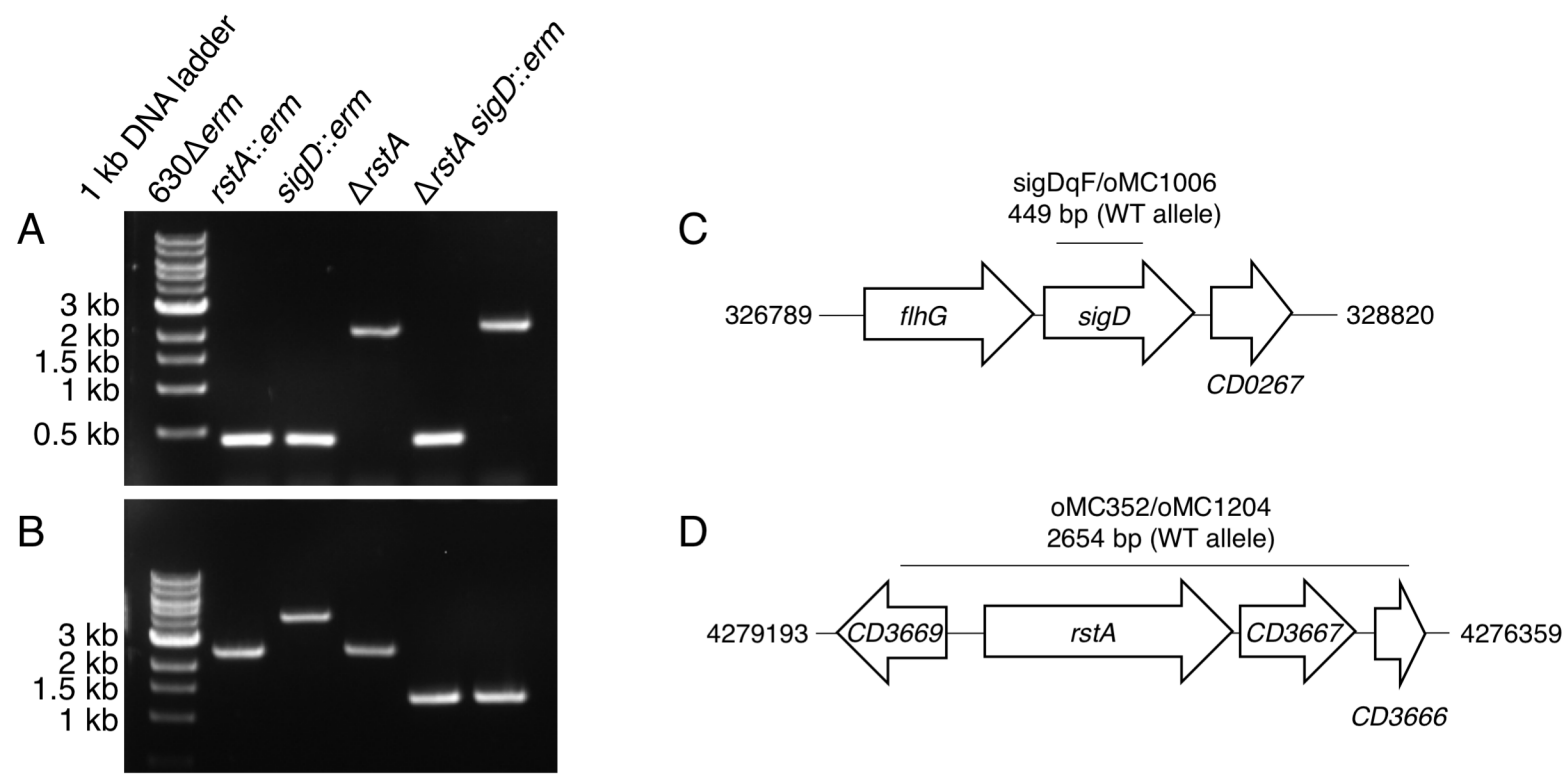

**Figure S7. PCR verification of the *rstA* and *sigD* mutations in *C. difficile* 630Δerm.** PCR amplification from overnight cultures of 630Δerm, *rstA::erm* (MC391), *sigD::erm* (RT1075), *rstA* (MC1118) and *rstA sigD::erm* (MC1278) strains using **(A)** primers sigDqF and oMC1006 to verify the *sigD* alleles (the expected sizes for the PCR products are 449 bp for the *sigD* wild-type allele and ~2449 bp for the *sigD::erm* insertion) and **(B)** primers oMC352 and oMC1204 to verify the *rstA* alleles (the expected sizes for the PCR products are 2654 bp for the wild-type allele, ~4654 bp for the *rstA::erm* allele and 1361 bp for the Δ*rstA* allele). The NEB 1 kb DNA ladder serves as the molecular marker. **(C, D)** A schematic representing the chromosomal organization of *sigD* **(C)** and *rstA* **(D)**. The lines above the genes represent the location of the wild-type product amplified with the indicated primers. The *rstA* gene is encoded on the complement strand.
