# Supplementary material for: RstA Is a Major Regulator of Clostridioides difficile Toxin Production and Motility
Source: PubMed Central journal article supplement (PMC6414698; doi:10.1128/mbio.01991-18), 2019-03-12
Supplement: mBio.01991-18-sf010.pdf [file mBio.01991-18-sf010.pdf]

# Figure S10.

|                             |                                                                                         |
|-----------------------------|-----------------------------------------------------------------------------------------|
| <i>PrstA</i>                | -----TAAAATAAATATAAGTTATAATTATATTA-----<br><div style="text-align: center;">-10</div>   |
| <i>PtcdA</i>                | ----ACATTAAAAAATATAAGATATGTTTACAAATT-----<br><div style="text-align: center;">-35</div> |
| <i>PtcdB</i>                | AATTTTATATTTTATATAGAACAAAGTTTACATATT-----<br><div style="text-align: center;">-35</div> |
| <i>PtcdR</i> ( $\sigma^A$ ) | --TGATTTAATTCCAATGTTGTCAAATTTTCAAATAAATCA<br><div style="text-align: center;">-35</div> |
| <i>PtcdR</i> ( $\sigma^D$ ) | -----ATTAATGTATTCATAATGCATATTTTCAT--                                                    |
| <i>PflgB</i>                | --ATATTTAAAAAATTTGTTATTTAT-----<br><div style="text-align: center;">-35</div>           |

**Figure S10. Alignment of inverted repeats within the promoters of direct RstA targets.** The inverted repeats identified by EMBOSS Palindrome Finder (Rice, *et al.* 2000) within each promoter that RstA directly binds are shown. The conserved -10 or -35 elements within each promoter are underlined. The predicted -35 element for *PtcdR*( $\sigma^D$ ) begins immediately following the sequence shown here. The two nucleotides that are important for RstA binding to *PrstA* DNA are marked in red.

Rice P, Longden I, Bleasby A. 2000. EMBOSS: the European molecular biology open software suite. *Trends Genet* 16: 276–277.
